# Supplementary material for: Trends of diagnostic adverse events in hospital deaths: longitudinal analyses of four retrospective record review studies
Source: publisher site journal article supplement (doi:10.1515/dx-2024-0117), 2024-11-26
Supplement: Supplementary file 1 [file j_dx-2024-0117_suppl_001.docx]

# Appendix 1. List of triggers in phase 1

List of triggers for deceased patients used by nurse reviewers in phase 1 of the record review. Based on list of Baker et al. (2004)

| **Trigger** |
| --- |
| Unplanned admission before index admission within 12 months |
| Hospital-incurred patient injury |
| Adverse drug reaction |
| Unplanned transfer from general care to intensive care |
| Unplanned transfer to other hospital after unexpected deterioration |
| Unplanned return to the operating room |
| Unplanned removal injury or repair of organ during surgery |
| Hospital-acquired infection or sepsis |
| Other patient complication * |
| Development of neurological deficit not present on admission |
| Unexpected death |
| Cardiac or respiratory arrest |
| Dissatisfaction with care documented in the medical record |
| Any other undesirable outcome not covered |
| * Includes acute myocardial infarction, cerebrovascular accident and pulmonary embolus |
