# Supplementary material for: Trends of diagnostic adverse events in hospital deaths: longitudinal analyses of four retrospective record review studies
Source: publisher site journal article supplement (doi:10.1515/dx-2024-0117), 2024-11-26
Supplement: Supplementary file 2 [file j_dx-2024-0117_suppl_002.docx]

# APPENDIX 2

Counts, percentages, and incidences of adverse events (AEs), AEs with preventable harm, and AEs with preventable death, shown for both diagnostic adverse events (DAEs) and other adverse event types (other AEs) for each year.

|  |  | **2008**  **(N=2007)** | | **2012**  **(N=2025)** | | **2016**  **(N=2846)** | | **2019**  **(N=2998)** | |
| --- | --- | --- | --- | --- | --- | --- | --- | --- | --- |
|  |  | **DAEs** | **Other AEs** | **DAEs** | **Other AEs** | **DAEs** | **Other AEs** | **DAEs** | **Other AEs** |
| **AEs** | **n (%)*** | 49 (14.0) | 302 (86.0) | 26 (10.0) | 233 (90.0) | 34 (10.9) | 278 (89.1) | 29 (6.1) | 445 (93.9) |
| **incidence** | 2.3 | 13.8 | 1.2 | 10.5 | 1.0 | 8.5 | 0.8 | 13.0 |
| **AEs with preventable harm** | **n (%)†** | 43 (84.9) | 109 (36.1) | 21 (79.5) | 69 (29.6) | 27 (78.8) | 98 (35.3) | 22 (82.9) | 111 (24.9) |
| **incidence** | 1.9 | 5.1 | 1.0 | 2.9 | 0.8 | 3.2 | 0.7 | 3.2 |
| **AEs with preventable death** | **n (%)‡** | 34 (79.1) | 74 (67.9) | 16 (76.2) | 35 (50.7) | 24 (88.9) | 68 (69.4) | 17 (77.3) | 81 (73.0) |
| **incidence** | 1.5 | 3.5 | 0.8 | 1.7 | 0.7 | 2.1 | 0.5 | 2.3 |
| Incidences were weighed based on hospital type.  AE, adverse event; DAE, diagnostic adverse event  * percentage based on total number of all AE cases per year;  † percentage based on total DAE/other AE cases per year;  ‡ percentage based on total DAE/other AE cases with preventable harm | | | | | | | | | |
